# Supplementary material
Source: PubMed Central journal article supplement (PMC2853447)
Supplement: supp_P001172_jlr.P001172-2.pdf [file supp_P001172_jlr.P001172-2.pdf]

Supplementary Table II: **Event analysis by NPC1L1 genotypes at baseline**

|          | Genotype | History of Claudication, N(%) | Adjusted <sup>b</sup> OR <sup>a</sup> | P    | History of MI, N(%) | Adjusted <sup>b</sup> OR <sup>a</sup> | P    | History of Vascular disease, N(%) | Adjusted <sup>b</sup> OR <sup>a</sup> | P    |
|----------|----------|-------------------------------|---------------------------------------|------|---------------------|---------------------------------------|------|-----------------------------------|---------------------------------------|------|
| -133 A>G | AA       | 175 (7.3)                     | 1                                     | 0.17 | 329 (13.6)          | 1                                     | 0.45 | 1081 (44.8)                       | 1                                     | 0.30 |
|          | AG + GG  | 191 (6.4)                     | 0.86 (0.70-1.07)                      |      | 397 (13.3)          | 0.94 (0.80-1.11)                      |      | 1312 (44.0)                       | 0.94 (0.83-1.06)                      |      |
| -18 A>C  | AA       | 275 (7.07)                    | 1                                     | 0.21 | 542 (13.9)          | 1                                     | 0.13 | 1755 (45.1)                       | 1                                     | 0.13 |
|          | AC + CC  | 91 (6.0)                      | 0.85 (0.67-1.09)                      |      | 185 (12.3)          | 0.87 (0.72-1.04)                      |      | 641 (42.5)                        | 0.90 (0.79-1.03)                      |      |
| L272L    | CC       | 134 (6.4)                     | 1                                     | 0.38 | 458 (13.9)          | 1                                     | 0.26 | 1481 (44.9)                       | 1                                     | 0.34 |
|          | CG + GG  | 232 (7.0)                     | 0.91 (0.72-1.13)                      |      | 269 (12.8)          | 0.91 (0.72-1.13)                      |      | 916 (43.6)                        | 0.94 (0.83-1.06)                      |      |
| V1296V   | CC       | 253 (7.4)                     | 1                                     | 0.02 | 479 (14.0)          | 1                                     | 0.23 | 1536 (44.8)                       | 1                                     | 0.54 |
|          | CT + TT  | 113 (5.8)                     | 0.76 (0.61-0.97)                      |      | 248 (12.6)          | 0.90 (0.76-1.07)                      |      | 858 (43.7)                        | 0.96 (0.85-1.09)                      |      |
| U3 A>G   | AA       | 252 (7.4)                     | 1                                     | 0.02 | 475 (13.9)          | 1                                     | 0.25 | 1527 (44.7)                       | 1                                     | 0.54 |
|          | AG + GG  | 113 (5.7)                     | 0.76 (0.60-0.96)                      |      | 250 (12.6)          | 0.90 (0.76-1.07)                      |      | 865 (43.7)                        | 0.96 (0.85-1.09)                      |      |
